# Supplementary material for: Holothurian Wall Hydrolysate Ameliorates Cyclophosphamide-Induced Immunocompromised Mice via Regulating Immune Response and Improving Gut Microbiota
Source: MDPI journal article supplement (doi:10.3390/ijms241612583), 2023-08-09
Supplement: s1 [file s1]

Table S1: The forward primer and reverse primer for qRT-PCR.

| Gene          | Gene Accession Number | Primer Sequences 5'-3'                                    | Product size (bp) |
|---------------|-----------------------|-----------------------------------------------------------|-------------------|
| GAPDH         | NM_001289726.1        | F: AGGTCGGTGTGAACGGATTTG<br>R: TGTAGACCATGTAGTTGAGGTC     | 123               |
| TNF- $\alpha$ | NM_013693.3           | F: ATGTCTCAGCCTCTTCTCATTC<br>R: GCTTGTCACCTCGAATTTTGAG    | 179               |
| IL-6          | NM_031168.2           | F: CTCCCAACAGACCTGTCTATAC<br>R: ACTCCAGGTAGCTATGGTACTC    | 258               |
| IL-1 $\beta$  | NM_008361.4           | F: TCGCAGCAGCACATCAACAAGAG<br>R: CTAATGGGAACGTCACACACCAGC | 209               |

Table S2: Summary of OTUs sequencing data attained.

| Samples | OTUs Number | Sequences | Sample Size (bases) | OTUs Reads |
|---------|-------------|-----------|---------------------|------------|
| NC1     | 530         | 113100    | 48110474            | 92903      |
| NC2     | 396         | 102491    | 43723810            | 92756      |
| NC3     | 315         | 83974     | 35713510            | 81194      |
| M1      | 529         | 105648    | 44717689            | 75885      |
| M2      | 495         | 89582     | 37974126            | 73128      |
| M3      | 444         | 114530    | 48503613            | 105717     |
| HWH-L1  | 636         | 99086     | 41894229            | 68860      |
| HWH-L2  | 573         | 92149     | 39212706            | 74834      |
| HWH-L3  | 548         | 117577    | 50019073            | 89014      |
| HWH-H1  | 700         | 123618    | 52255791            | 95562      |
| HWH-H2  | 555         | 98554     | 41610830            | 74018      |
| HWH-H3  | 643         | 98316     | 41376776            | 73812      |
| PC1     | 370         | 85293     | 35983737            | 83487      |
| PC2     | 613         | 121490    | 51381017            | 91173      |
| PC3     | 678         | 118720    | 50295278            | 89909      |
| NH1     | 771         | 122252    | 51543743            | 84554      |
| NH2     | 576         | 75637     | 31728517            | 57439      |
| NH3     | 614         | 97212     | 41045291            | 66304      |

Table S3: Summary of alpha diversity indices estimation via 16S rRNA gene sequencing.

| Samples | ACE | Chao 1 | Shannon | Simpson | Coverage |
|---------|-----|--------|---------|---------|----------|
| NC1     | 583 | 571    | 3.52    | 0.0689  | 0.999    |
| NC2     | 432 | 492    | 2.77    | 0.1913  | 0.999    |
| NC3     | 344 | 345    | 2.75    | 0.17    | 0.999    |
| M1      | 585 | 576    | 4.07    | 0.0317  | 0.998    |
| M2      | 536 | 534    | 3.95    | 0.0374  | 0.999    |

|               |     |     |      |        |       |
|---------------|-----|-----|------|--------|-------|
| <b>M3</b>     | 484 | 489 | 3.75 | 0.0414 | 0.999 |
| <b>HWH-L1</b> | 696 | 695 | 4.29 | 0.0355 | 0.998 |
| <b>HWH-L2</b> | 646 | 653 | 3.95 | 0.043  | 0.998 |
| <b>HWH-L3</b> | 612 | 596 | 3.88 | 0.0435 | 0.999 |
| <b>HWH-H1</b> | 763 | 753 | 4.27 | 0.035  | 0.999 |
| <b>HWH-H2</b> | 617 | 616 | 3.69 | 0.0906 | 0.998 |
| <b>HWH-H3</b> | 690 | 673 | 4.35 | 0.0356 | 0.998 |
| <b>PC1</b>    | 380 | 378 | 4.07 | 0.0368 | 0.999 |
| <b>PC2</b>    | 685 | 683 | 3.99 | 0.0372 | 0.998 |
| <b>PC3</b>    | 734 | 721 | 3.94 | 0.0534 | 0.999 |
| <b>NH1</b>    | 827 | 807 | 4.64 | 0.0205 | 0.998 |
| <b>NH2</b>    | 646 | 648 | 4.37 | 0.0309 | 0.998 |
| <b>NH3</b>    | 686 | 670 | 4.23 | 0.0287 | 0.998 |

Table S4: Percentage of bacterial phyla in different treatment groups.

| <b>Groups</b>                  | <b>NC</b> | <b>M</b> | <b>HWH-L</b> | <b>HWH-H</b> | <b>PC</b> | <b>NH</b> |
|--------------------------------|-----------|----------|--------------|--------------|-----------|-----------|
| <i><b>Bacteroidetes</b></i>    | 18.3      | 69.25    | 63.10        | 45.82        | 68.19     | 65.48     |
| <i><b>Firmicutes</b></i>       | 74.18     | 28.34    | 34.23        | 50.51        | 28.88     | 31.18     |
| <i><b>Proteobacteria</b></i>   | 4.21      | 0.98     | 0.80         | 2.54         | 1.12      | 1.39      |
| <i><b>Actinobacteria</b></i>   | 0.49      | 0.71     | 0.89         | 0.18         | 0.62      | 1.41      |
| <i><b>Deferribacteres</b></i>  | 1.81      | 0.15     | 0.56         | 0.35         | 0.52      | 0.06      |
| <i><b>Chloroflexi</b></i>      | 0         | 0        | 0            | 0            | 0         | 0         |
| <i><b>Cyanobacteria</b></i>    | 0.01      | 0        | 0.08         | 0.15         | 0         | 0.01      |
| <i><b>Gemmatimonadetes</b></i> | 0         | 0        | 0            | 0            | 0         | 1.39      |
| <i><b>Saccharibacteria</b></i> | 0.15      | 0.09     | 0.06         | 0.06         | 0.13      | 0.18      |
| <i><b>Tenericutes</b></i>      | 0.63      | 0.38     | 0.11         | 0.14         | 0.4       | 0.14      |
| <i><b>Verrucomicrobia</b></i>  | 0.01      | 0        | 0.01         | 0.01         | 0.01      | 0         |

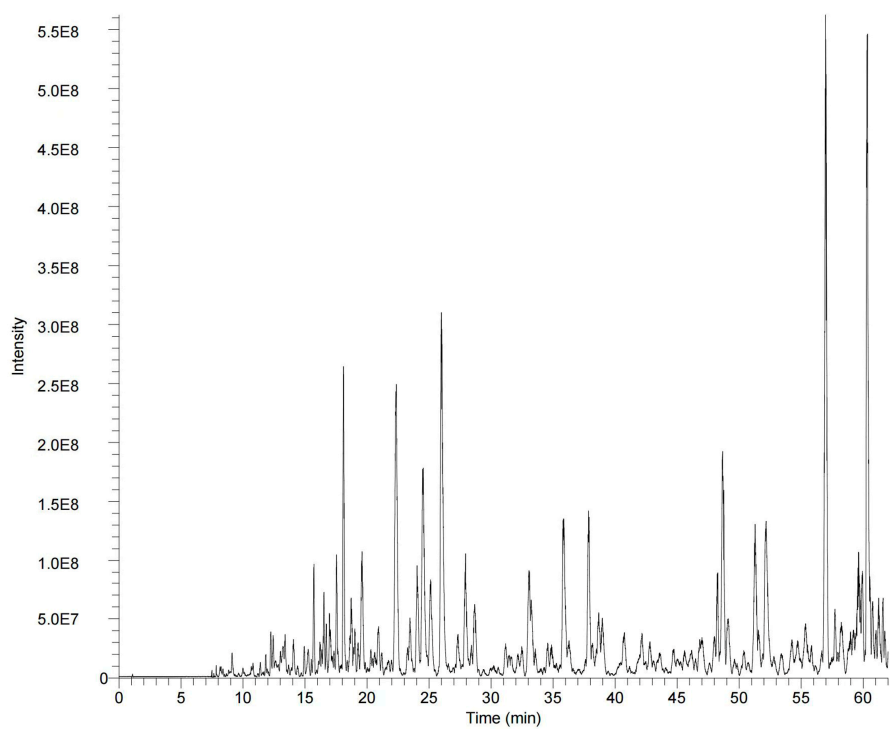

Figure S1. Total ion current diagram of HWH. Scanning range: 300-1400 m/z.
